# Supplementary material
Source: PubMed Central journal article supplement (PMC6866260)
Supplement: HBM-39-1118-s001.pdf [file HBM-39-1118-s001.pdf]

Supplementary Material: Functional connectivity in dementia with Lewy bodies: A within- and between-network analysis

Julia Schumacher, Luis R. Peraza, Michael Firbank, Alan J. Thomas, Marcus Kaiser, Peter Gallagher, John T. O'Brien, Andrew M. Blamire, John-Paul Taylor

Contents

1. Independent healthy control group
2. Locations of RSN spatial maps
3. Comparison of functional connectivity between HC and AD
4. Positive and negative correlations
5. Clinical correlations in the DLB group
6. Voxel-based morphometry analysis
7. Effect of dichotomous study covariate
8. Supplementary references

## 1. Independent healthy control group

Table S1: Demographics of independent healthy control group, compared to control group from main analysis

|              | HC main analysis<br>(N=31) | HC for RSN template<br>estimation<br>(N=42) | Between-group comparison  |
|--------------|----------------------------|---------------------------------------------|---------------------------|
| Male: female | 22:9                       | 25:17                                       | $\chi^2=1.02$ , $p=0.31$  |
| Age          | 76.4 (7.2)                 | 69.0 (8.7)                                  | $t_{70}=3.85$ , $p<0.001$ |
| MMSE         | 28.9 (1.1)                 | 29.2 (1.4)                                  | $t_{70}=1.08$ , $p=0.29$  |

HC, healthy controls; MMSE, Mini Mental State Examination

To estimate independent healthy resting state networks (RSNs), 44 healthy older adult controls (HC) from two previous studies were selected. They were significantly younger than the HCs from the main analysis, but matched in terms of overall cognition (Supplementary Table S1).

All participants were scanned on the same scanner as the participants from the main analysis.

Eighteen of the additional HC participants were scanned with a slightly different scanner protocol with a change in the TR to 2072 ms and a change in the voxel size of the resting state scans to 3 x 3 x 4 mm<sup>3</sup>.

The resting state data were preprocessed in the same way as described in the main manuscript. Two subjects were excluded because they exceeded the motion exclusion criteria resulting in 42 independent HC participants that were included in the generation of the RSN templates.

## 2. Locations of RSN spatial maps

Table S2: List of all resting state networks (RSNs) included in the analysis. Anatomical labels refer to bilateral areas if not stated otherwise. Locations of RSNs are estimated from the Harvard-Oxford Cortical and Subcortical Structural Atlases and the Cerebellar Atlas in FSL.

| RSN name                         |      | Brain regions                                                                                                                    |
|----------------------------------|------|----------------------------------------------------------------------------------------------------------------------------------|
| Lateral sensorimotor network     | LSMN | Pre- and postcentral gyrus                                                                                                       |
| Medial sensorimotor network      | MSMN | Pre- and postcentral gyrus, supplementary motor area                                                                             |
| Supplementary motor area network | SMAN | Supplementary motor area, precentral gyrus                                                                                       |
| Left motor network               | LMN  | Left post- and precentral gyrus                                                                                                  |
| Right motor network              | RMN  | Right post- and precentral gyrus                                                                                                 |
| Basal ganglia network            | BGN  | Putamen, caudate                                                                                                                 |
| Thalamic network                 | THN  | Thalamus                                                                                                                         |
| Cerebellar network 1             | CBN1 | Cerebellum crus I, crus II                                                                                                       |
| Cerebellar network 2             | CBN2 | Cerebellum V, VI                                                                                                                 |
| Medial visual network            | MVN  | Intracalcarine cortex, supracalcarine cortex, lingual gyrus                                                                      |
| Lateral visual network           | LVN  | Superior lateral occipital cortex, precuneus                                                                                     |
| Occipital pole network           | OPN  | Occipital pole                                                                                                                   |
| Lingual gyrus network            | LGN  | Lingual gyrus, intracalcarine cortex                                                                                             |
| Superior visual network          | SVN  | Superior lateral occipital cortex, occipital pole                                                                                |
| Temporal network                 | TN   | Planum temporale, Heschl's gyrus                                                                                                 |
| Temporal pole network            | TPN  | Temporal pole                                                                                                                    |
| Insular network 1                | ISN1 | Insular cortex, frontal operculum cortex                                                                                         |
| Insular network 2                | ISN2 | Insular cortex, planum polare                                                                                                    |
| Anterior cingulate network       | ACN  | Anterior cingulate cortex                                                                                                        |
| Default mode network 1           | DMN1 | Precuneus, posterior cingulate cortex                                                                                            |
| Default mode network 2           | DMN2 | Precuneus                                                                                                                        |
| Default mode network 3           | DMN3 | Precuneus, superior lateral occipital cortex                                                                                     |
| Supramarginal gyrus network      | SPGN | Supramarginal gyrus                                                                                                              |
| Right fronto-parietal network    | RFPN | Right superior lateral occipital cortex, right angular gyrus, right middle frontal gyrus, left superior lateral occipital cortex |
| Left fronto-parietal network     | LFPN | Left superior lateral occipital cortex, right angular gyrus, left middle frontal gyrus, right superior lateral occipital cortex  |
| Dorsal attention network         | DAN  | Superior parietal lobule, supramarginal gyrus, superior lateral occipital cortex                                                 |
| Ventral attention network        | VAN  | Middle frontal gyrus, inferior frontal gyrus                                                                                     |

### 3. Comparison of functional connectivity between HC and AD

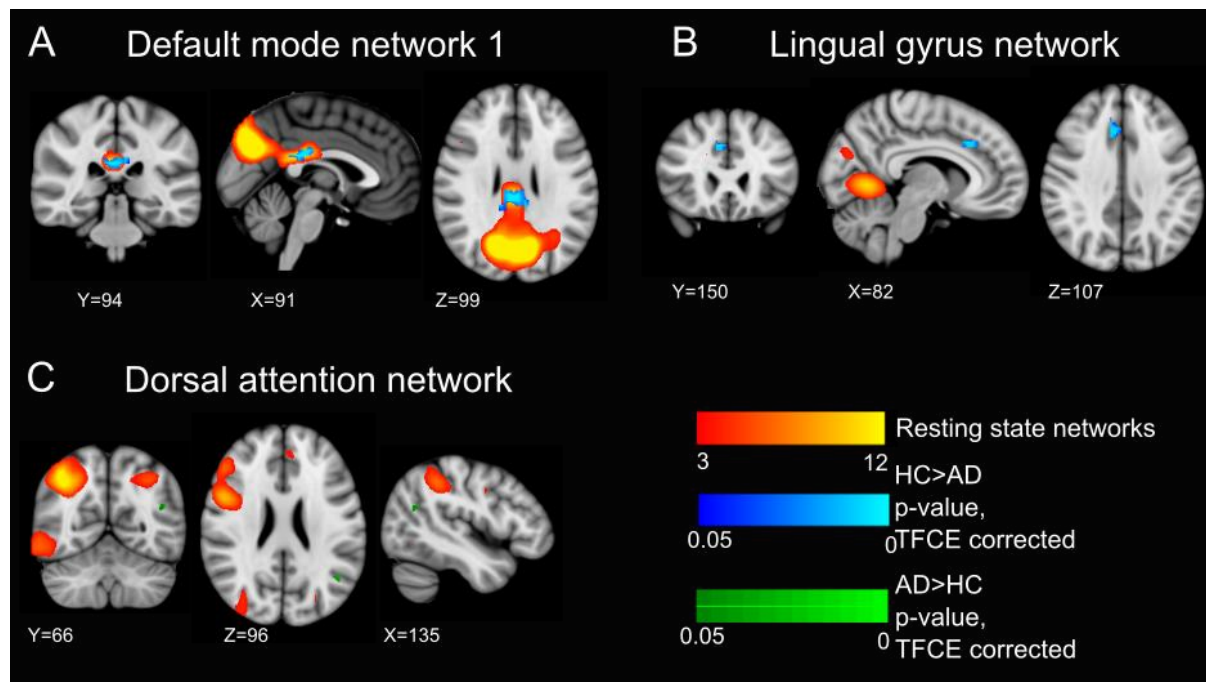

Figure S1: Dual regression results for comparison between AD and HC. RSN maps are shown in red-yellow. A,B) Clusters with decreased connectivity in AD; HC>AD,  $p < 0.05$ , threshold free cluster enhancement (TFCE) corrected, shown in blue. C) Cluster with increased connectivity in AD; AD>HC,  $p < 0.05$ , TFCE corrected, shown in green.

Table S3: Dual regression results for comparison between AD and HC. All clusters are reported with  $p < 0.05$ , threshold free cluster enhancement (TFCE) corrected. The table shows the number of significant voxels per cluster, the minimal p-value inside the cluster, the MNI coordinates of the voxel with minimal p-value, and the location of the cluster (estimated from the Harvard-Oxford Cortical and Subcortical Structural Atlases and the Cerebellar Atlas in FSL).

|                          | N voxels | p-value | MNI (X, Y, Z) | Location                                     |
|--------------------------|----------|---------|---------------|----------------------------------------------|
| <i>HC &gt; AD</i>        |          |         |               |                                              |
| Default mode network 1   |          |         |               |                                              |
| DMN1-1                   | 63       | <0.001  | 20, 22, 24    | L posterior cingulate, R posterior cingulate |
| Lingual gyrus network    |          |         |               |                                              |
| LGN-1                    | 17       | 0.002   | 20, 37, 27    | R paracingulate gyrus                        |
| Right motor network      |          |         |               |                                              |
| RMN-1                    | 2        | 0.028   | 12, 33, 24    | R precentral gyrus, R inferior frontal gyrus |
| <i>AD &gt; HC</i>        |          |         |               |                                              |
| Dorsal attention network |          |         |               |                                              |
| DAN-1                    | 6        | 0.03    | 34, 17, 24    | L angular gyrus                              |

#### 4. Positive and negative correlations

Although decreased connectivity in the DLB group is reported for all clusters in panels A-F of Figure 2, it was evident that some of these results were due to correlations shifting from positive in the control group to negative in the DLB group (e.g. TN-1). Similarly, increased connectivity in the DLB group could also be due to correlations being negative in HC, and shifting to positive correlations in DLB (e.g. ISN2-1), see Supplementary Figure S2.

Anticorrelations are not easy to interpret and shifts from positive to negative or from negative to positive correlations in patient groups are even harder to understand. However, while it has previously been believed that anticorrelations might be a mere result of certain preprocessing steps [Murphy et al., 2009], it has recently been argued that they have an actual biological origin [Chai et al., 2012; Keller et al., 2013; Liang et al., 2012]. Furthermore, negative synchronizations have been observed in Parkinson's disease where it has been hypothesized that they might represent a compensatory mechanism [Peraza et al., 2017].

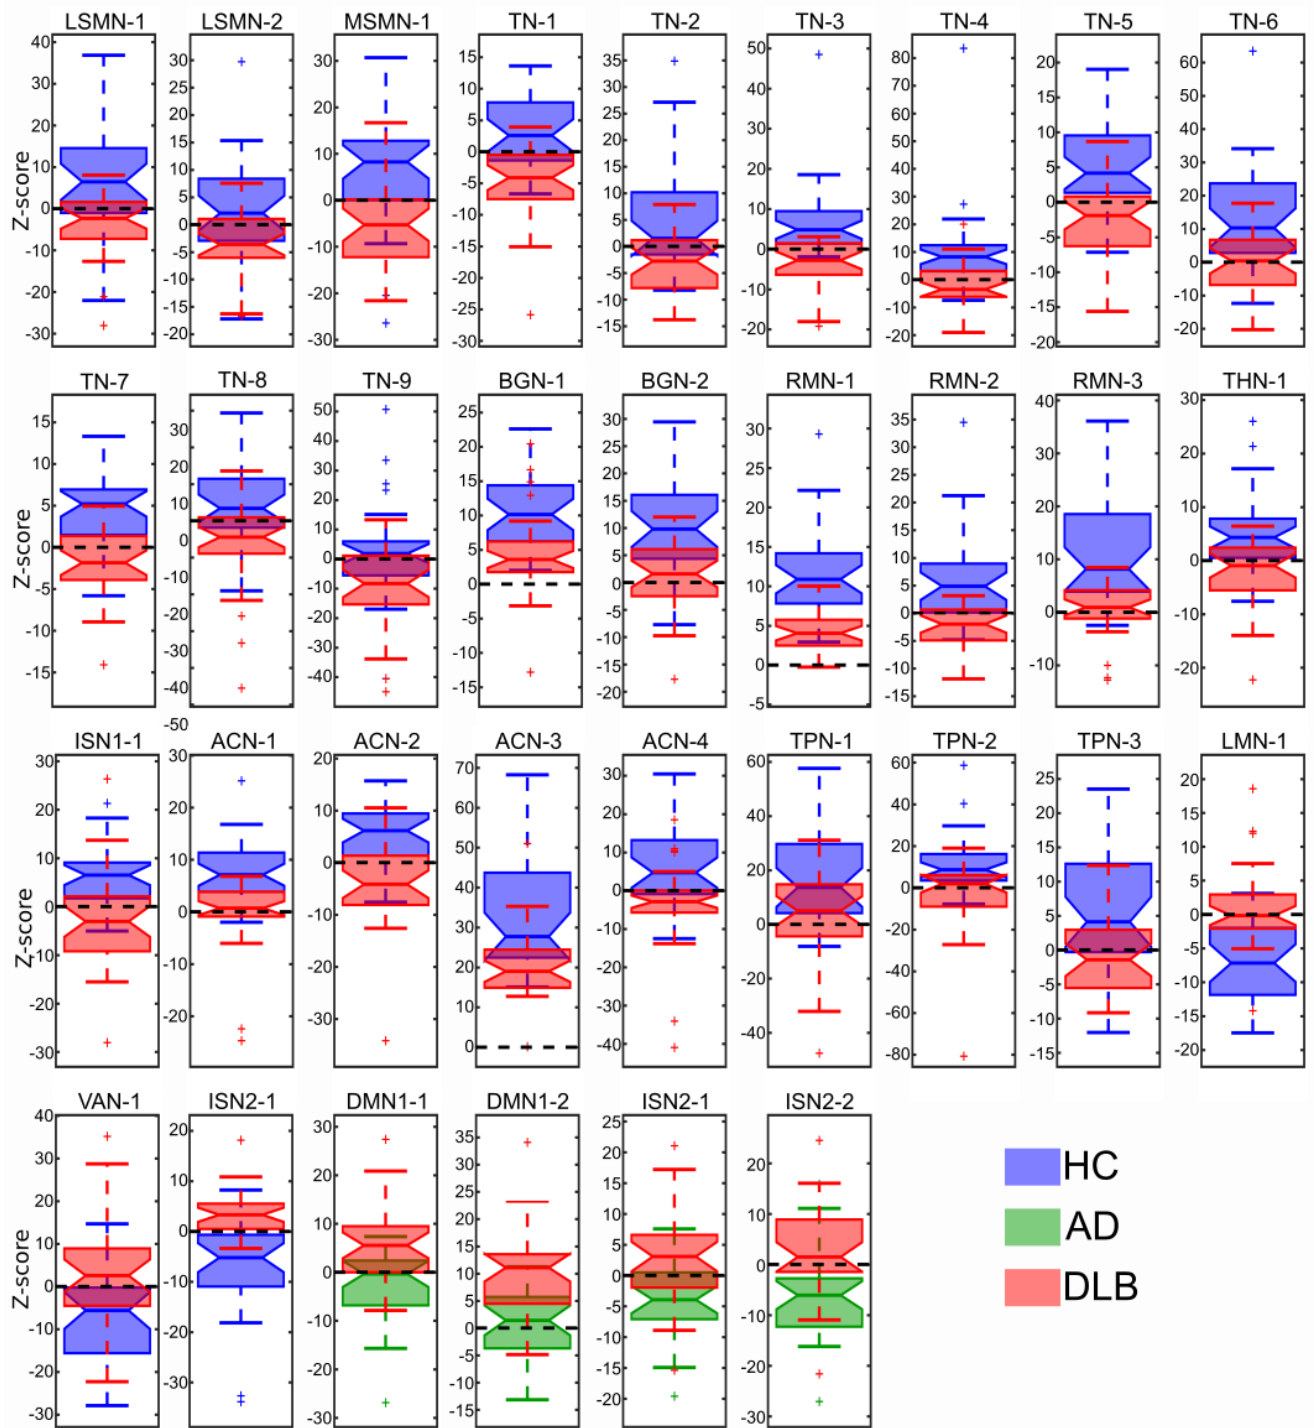

Figure S2: Mean z scores for all clusters showing a significant difference between DLB and HC and DLB and AD (see Figure 2 and Table II). In each boxplot the central line corresponds to the sample median, the upper and lower border of the box represent the 25<sup>th</sup> and 75<sup>th</sup> percentile, respectively, and the length of the whiskers is 1.5 times the interquartile range, outliers are shown by +.

## 5. Clinical correlations in the DLB group

Table S4: Spearman's rank correlation between mean functional connectivity within significant clusters from dual regression and clinical scores in the DLB group. All clusters are shown that have an uncorrected p-value<0.05.

| CAF total <sup>a</sup>          |                |                |                  |
|---------------------------------|----------------|----------------|------------------|
|                                 |                | p, uncorrected | p, FDR-corrected |
| ACN-4                           | $\rho = -0.38$ | 0.04           | 0.931            |
| DMN1-2                          | $\rho = -0.37$ | 0.047          | 0.931            |
| CAF duration <sup>a</sup>       |                |                |                  |
| ACN-4                           | $\rho = -0.40$ | 0.03           | 0.931            |
| DMN1-2                          | $\rho = -0.39$ | 0.03           | 0.931            |
| ISN2-1                          | $\rho = 0.38$  | 0.04           | 0.931            |
| CAF frequency <sup>a</sup>      |                |                |                  |
| TN-6                            | $\rho = -0.37$ | 0.04           | 0.931            |
| NPI hallucinations <sup>b</sup> |                |                |                  |
| LSMN-2                          | $\rho = -0.44$ | 0.02           | 0.931            |

<sup>a</sup> N = 30, <sup>b</sup> N=29

In addition to investigating correlations with mean connectivity within a cluster, we also tested voxelwise correlations with clinical scores. To this end, the dual regression z-scores for all DLB participants were concatenated in one 4D image and correlations with clinical scores were tested using a GLM in FSL with the respective clinical score as covariate in the design matrix. Statistical significance was assessed using randomize with 5000 permutations including a mask for the significant clusters from the HC-DLB and AD-DLB group comparisons. There was one cluster of 4 voxels in the right occipital fusiform gyrus belonging to the temporal network (TN-1) that showed negative correlation with the CAF total score. Additionally, there was a very small cluster of one voxel in the right precentral gyrus belonging to the right motor network (RMN-1) where connectivity was positively correlated with the CAF total score. However, none of these clusters survived FDR-correction for multiple comparisons. We did not find any significant clusters for any of the other clinical scores.

## 6. Voxel-based morphometry analysis

To study changes in grey matter between the three groups a voxel-based morphometry analysis was conducted using DARTEL in SPM12 using age, gender, and total intracranial volume as covariates.

The AD group showed clusters of reduced grey matter compared to controls, mainly in right and left hippocampus (Supplementary Figure S3). No regions showed increased grey matter in AD compared to controls.

The DLB group had reduced grey matter in a small cluster in right cingulate (Supplementary Figure S4). Again, there were no areas of increased grey matter in DLB compared to controls. There was also no difference in grey matter between the two dementia groups.



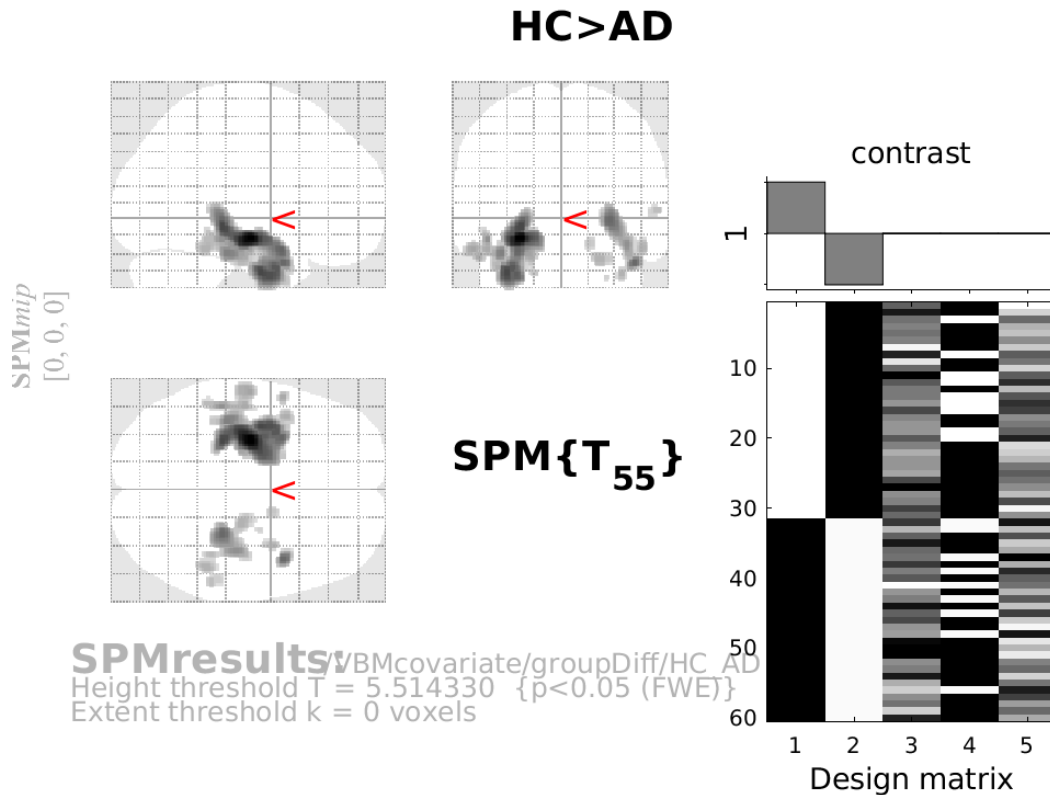

**Statistics:  $p$ -values adjusted for search volume**

| set-level |     | cluster-level         |                       |       |                     | peak-level            |                       |      |           |                     | mm mm mm |     |     |
|-----------|-----|-----------------------|-----------------------|-------|---------------------|-----------------------|-----------------------|------|-----------|---------------------|----------|-----|-----|
| $p$       | $c$ | $p_{\text{FWE-corr}}$ | $p_{\text{FDR-corr}}$ | $k_E$ | $p_{\text{uncorr}}$ | $p_{\text{FWE-corr}}$ | $p_{\text{FDR-corr}}$ | $T$  | $(Z_{=})$ | $p_{\text{uncorr}}$ |          |     |     |
| 0.000     | 9   | 0.000                 | 0.000                 | 4588  | 0.000               | 0.000                 | 0.004                 | 8.27 | 6.64      | 0.000               | -27      | -15 | -14 |
|           |     |                       |                       |       |                     | 0.000                 | 0.028                 | 7.33 | 6.10      | 0.000               | -27      | -32 | -8  |
|           |     |                       |                       |       |                     | 0.000                 | 0.028                 | 7.30 | 6.08      | 0.000               | -36      | -8  | -34 |
|           |     | 0.001                 | 0.024                 | 112   | 0.010               | 0.000                 | 0.033                 | 6.96 | 5.87      | 0.000               | 44       | 6   | -28 |
|           |     | 0.000                 | 0.000                 | 1127  | 0.000               | 0.001                 | 0.034                 | 6.92 | 5.85      | 0.000               | 28       | -32 | -3  |
|           |     |                       |                       |       |                     | 0.002                 | 0.116                 | 6.47 | 5.56      | 0.000               | 39       | -24 | -18 |
|           |     |                       |                       |       |                     | 0.008                 | 0.253                 | 6.09 | 5.30      | 0.000               | 48       | -42 | -20 |
|           |     | 0.007                 | 0.156                 | 32    | 0.138               | 0.006                 | 0.242                 | 6.18 | 5.36      | 0.000               | -54      | 6   | -26 |
|           |     | 0.000                 | 0.012                 | 149   | 0.004               | 0.008                 | 0.253                 | 6.09 | 5.30      | 0.000               | 22       | -20 | -27 |
|           |     | 0.003                 | 0.098                 | 57    | 0.055               | 0.009                 | 0.268                 | 6.06 | 5.28      | 0.000               | 36       | 0   | -36 |
|           |     | 0.004                 | 0.121                 | 46    | 0.081               | 0.015                 | 0.354                 | 5.91 | 5.17      | 0.000               | 57       | -39 | 3   |
|           |     | 0.007                 | 0.156                 | 33    | 0.133               | 0.018                 | 0.406                 | 5.84 | 5.13      | 0.000               | 15       | -2  | -16 |
|           |     | 0.025                 | 0.488                 | 7     | 0.488               | 0.032                 | 0.641                 | 5.66 | 5.00      | 0.000               | 26       | -9  | -38 |

table shows 3 local maxima more than 8.0mm apart

Height threshold:  $T = 5.51$ ,  $p = 0.000$  (0.050) Degrees of freedom = [1.0, 55.0]  
 Extent threshold:  $k = 0$  voxels FWHM = 13.3 13.7 13.7 mm mm mm; 8.9 9.1 9.1 {vox  
 Expected voxels per cluster,  $\langle k \rangle = 15.298$  Volume: 5241928 = 1553164 voxels = 2044.0 resels  
 Expected number of clusters,  $\langle c \rangle = 0.05$  Voxel size: 1.5 1.5 1.5 mm mm mm; (resel = 738.30 v  
 FWEp: 5.514, FDRp: 6.923, FWEc: 7, FDRc: 112

Figure S3: Results from VBM analysis comparing AD and controls.

# HC > DLB

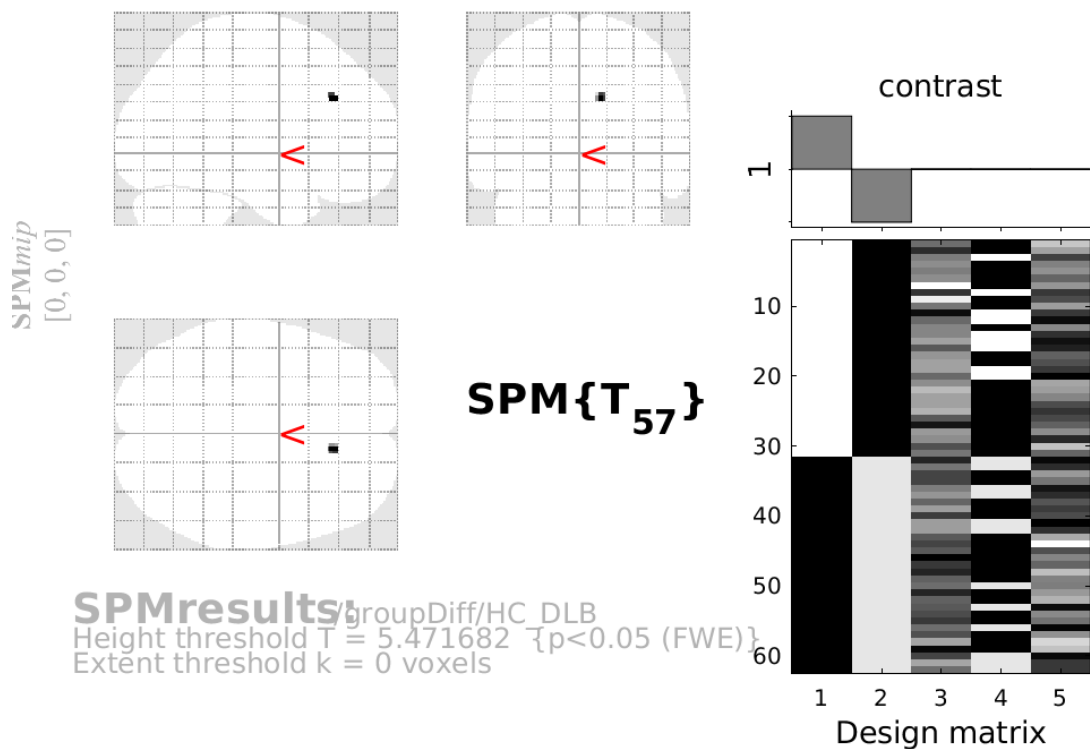

## Statistics: *p-values adjusted for search volume*

| cluster-level  |                |       |              | peak-level     |                |      |                |              | mm mm mm |    |    |
|----------------|----------------|-------|--------------|----------------|----------------|------|----------------|--------------|----------|----|----|
| $p_{FWE-corr}$ | $p_{FDR-corr}$ | $k_E$ | $p_{uncorr}$ | $p_{FWE-corr}$ | $p_{FDR-corr}$ | $T$  | $(Z_{\equiv})$ | $p_{uncorr}$ |          |    |    |
| 0.020          | 0.397          | 11    | 0.397        | 0.023          | 0.461          | 5.71 | 5.06           | 0.000        | 10       | 30 | 30 |

table shows 3 local maxima more than 8.0mm apart

Height threshold:  $T = 5.47$ ,  $p = 0.000$  (0.050) Degrees of freedom = [1.0, 57.0]  
 Extent threshold:  $k = 0$  voxels FWHM = 13.5 14.0 13.9 mm mm mm; 9.0 9.3 9.2 {vox  
 Expected voxels per cluster,  $\langle k \rangle = 16.465$  Volume: 5252043 = 1556161 voxels = 1946.8 resels  
 Expected number of clusters,  $\langle c \rangle = 0.05$  Voxel size: 1.5 1.5 1.5 mm mm mm; (resel = 776.67 v  
 FWEp: 5.472, FDRp: Inf, FWEc: 11, FDRc: Inf

Figure S4: Results from VBM analysis comparing DLB and controls.

## 7. Effect of dichotomous study covariate

To study the effect of the inclusion of the dichotomous study covariate, we repeated the dual regression analysis without the covariate and compared the results. Group differences were found in the same networks (see Supplementary Figure S5), the only difference being that some clusters became a bit larger (e.g. basal ganglia network) or smaller (e.g. insular networks) when including the covariate. Nevertheless, we decided to include the covariate in our main analysis to account for small differences between the two studies in terms of recruitment and imaging protocol.

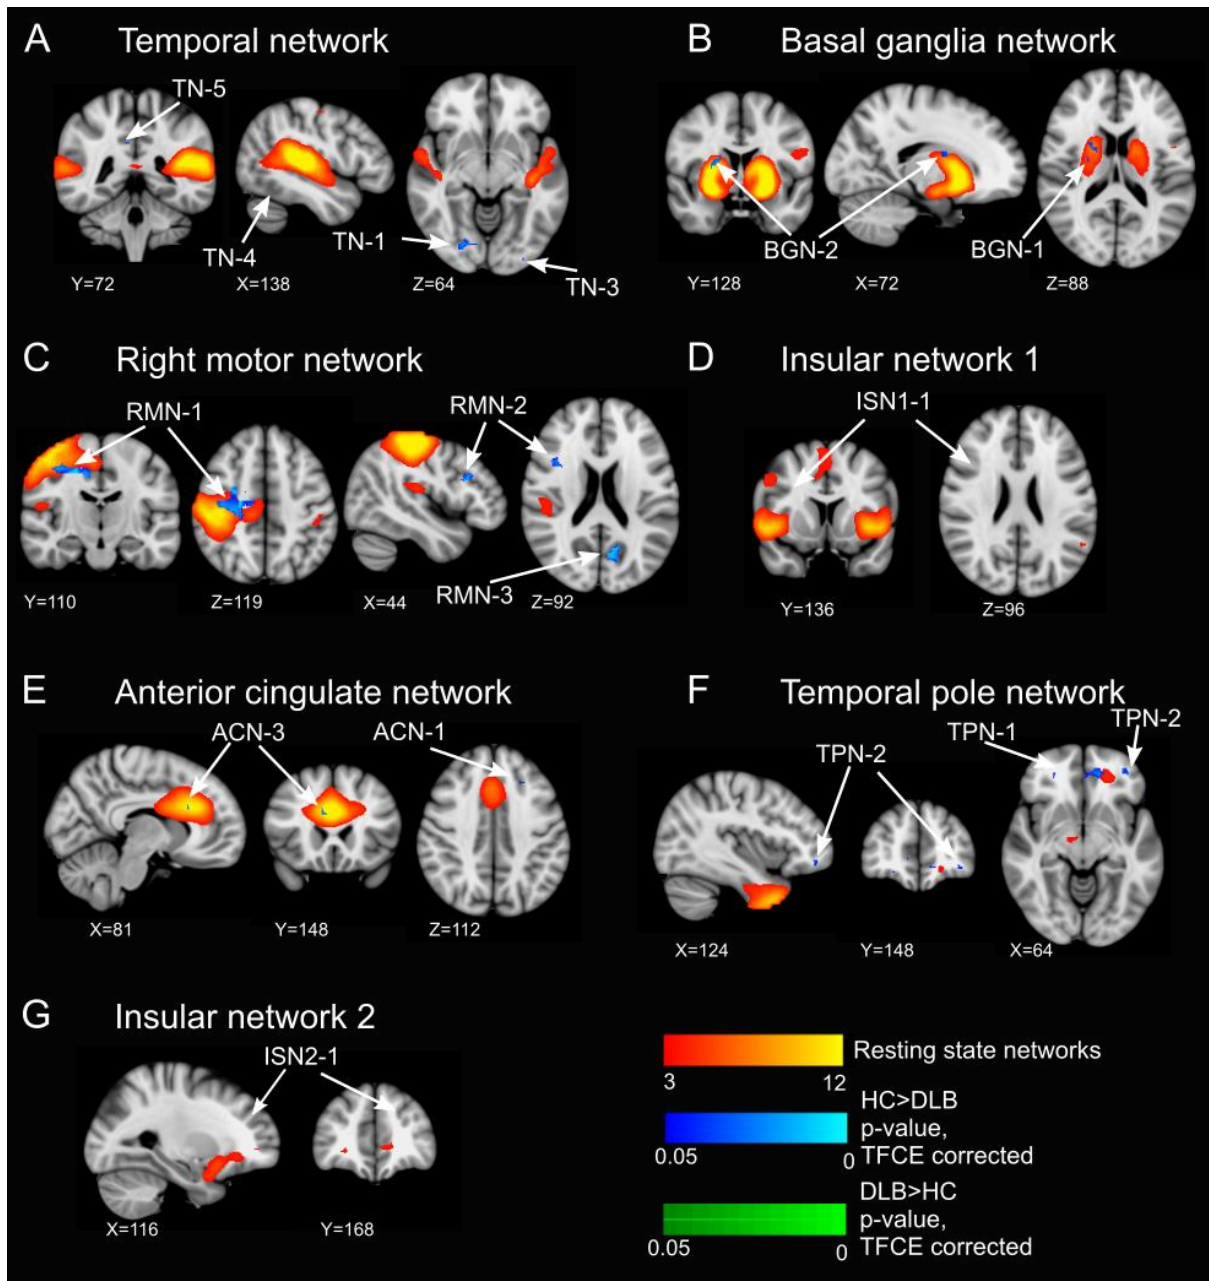

Figure S5: Dual regression results for comparison between DLB and HC without the addition of a dichotomous covariate for study membership. RSN maps are shown in red-yellow and significant group differences are shown in blue/green. All images shown in radiological convention.

## 8. Supplementary references

Chai XJ, Castañán AN, Öngür D, Whitfield-Gabrieli S (2012): Anticorrelations in resting state networks without global signal regression. *Neuroimage* 59:1420–1428.

Keller CJ, Bickel S, Honey CJ, Groppe DM, Entz L, Craddock RC, Lado FA, Kelly C, Milham M, Mehta AD (2013): Neurophysiological Investigation of Spontaneous Correlated and Anticorrelated Fluctuations of the BOLD Signal. *J Neurosci* 33:6333–6342.

Liang Z, King J, Zhang N (2012): Anticorrelated resting-state functional connectivity in awake rat brain. *Neuroimage* 59:1190–1199.

Murphy K, Birn RM, Handwerker DA, Jones TB, Bandettini PA (2009): The impact of global signal regression on resting state correlations: Are anti-correlated networks introduced? *Neuroimage* 44:893–905.

Peraza LR, Nesbitt D, Lawson RA, Duncan GW, Yarnall AJ, Khoo TK, Kaiser M, Firbank MJ, O'Brien JT, Barker RA, Brooks DJ, Burn DJ, Taylor J-P (2017): Intra- and inter-network functional alterations in Parkinson's disease with mild cognitive impairment. *Hum Brain Mapp* 38:1702–1715.
